# Supplementary material for: Positive selection on panpulmonate mitogenomes provide new clues on adaptations to terrestrial life
Source: BMC Evol Biol. 2016 Aug 22;16(1):164. doi: 10.1186/s12862-016-0735-8 (PMC4994307; doi:10.1186/s12862-016-0735-8)
Supplement: Additional file 3: — Comparison of models M0 (one-ratio), M1a (nearly neutral), and M2a (positive selection), and. Values in bold represent highly significant differences (p < 0.01) from the null model. LRT: Likelihood ratio test, df: degrees of freedom, lnL: log likelihood, np: number of parameters. (XLSX 14 kb) [file 12862_2016_735_MOESM3_ESM.xlsx]

## Sheet: Additional File 3
atp6
Model				LRT			Parameters
	np	ln L	Null	2Δ lnL	df		ω0	%	ω1	%	ω2	%
M0	2	-23566.8					0.04933
M1a	3	-23368.9	M0	395.901	1		0.05565	82.07	1	17.93
M2a	5	-23368.8	M1a	0.174394	2		0.05615	82.826	1	17.173	999	1e-05
cox1
Model				LRT			Parameters
	np	ln L	Null	2Δ lnL	df		ω0	%	ω1	%	ω2	%
M0	2	-30983.8					0.00603
M1a	3	-30899	M0	169.614	1		0.00834	89.828	1	10.172
M2a	5	-30854.9	M1a	88.1334	2		0.00861	98.251	1	1.734	999	0.00015
cox2
Model				LRT			Parameters
	np	ln L	Null	2Δ lnL	df		ω0	%	ω1	%	ω2	%
M0	2	-18168.6					0.01977
M1a	3	-18042.2	M0	252.633	1		0.02837	83.941	1	16.059
M2a	5	-18015.7	M1a	53.1501	2		0.03272	96.911	1	3.07	999	0.00019
cox3
Model				LRT			Parameters
	np	ln L	Null	2Δ lnL	df		ω0	%	ω1	%	ω2	%
M0	2	-21385.4					0.02123
M1a	3	-21196.1	M0	378.689	1		0.02881	73.643	1	26.357
M2a	5	-21159	M1a	74.298	2		0.03275	91.505	1	8.469	999	0.00026
cob
Model				LRT			Parameters
	np	ln L	Null	2Δ lnL	df		ω0	%	ω1	%	ω2	%
M0	2	-30692.5					0.02006
M1a	3	-30416.8	M0	551.509	1		0.02441	87.709	1	12.291
M2a	5	-30401.6	M1a	30.2867	2		0.02657	94.893	1	5.097	999	0.0001
nad1
Model				LRT			Parameters
	np	ln L	Null	2Δ lnL	df		ω0	%	ω1	%	ω2	%
M0	2	-28279.8					0.02979
M1a	3	-28047.3	M0	465.028	1		0.03425	89.357	1	10.643
M2a	5	-28045.7	M1a	3.12763	2		0.03546	91.806	1	8.19	999	4e-05
nad2
Model				LRT			Parameters
	np	ln L	Null	2Δ lnL	df		ω0	%	ω1	%	ω2	%
M0	2	-36923.3					0.0761
M1a	3	-36553.7	M0	739.189	1		0.07987	89.774	1	10.226
M2a	5	-36553.7	M1a	-0.000578	2		0.07987	89.774	1	10.226	55.0491	0
nad4
Model				LRT			Parameters
	np	ln L	Null	2Δ lnL	df		ω0	%	ω1	%	ω2	%
M0	2	-47781.1					0.04834
M1a	3	-47287.5	M0	987.156	1		0.05538	84.809	1	15.191
M2a	5	-47287.5	M1a	-2e-06	2		0.05538	84.809	1	15.191	77.66	0
nad5
Model				LRT			Parameters
	np	ln L	Null	2Δ lnL	df		ω0	%	ω1	%	ω2	%
M0	2	-59285.1					0.04566
M1a	3	-58590.7	M0	1388.89	1		0.05657	77.332	1	22.668
M2a	5	-58589.1	M1a	3.19936	2		0.05748	79.921	1	20.076	999	3e-05
