# Supplementary material for: Positive selection on panpulmonate mitogenomes provide new clues on adaptations to terrestrial life
Source: BMC Evol Biol. 2016 Aug 22;16(1):164. doi: 10.1186/s12862-016-0735-8 (PMC4994307; doi:10.1186/s12862-016-0735-8)
Supplement: Additional file 4: — Comparison of models M7, M8 and M8a. Values in bold represent highly significant differences (p < 0.01) from the null model. LRT: Likelihood ratio test, df: degrees of freedom, lnL: log likelihood, np: number of parameters. (XLSX 14 kb) [file 12862_2016_735_MOESM4_ESM.xlsx]

## Sheet: Additional File 4
atp6
Model				LRT			Parameters
	np	ln L	Null	2Δ lnL	df		p0 (%)	p1 (%)	ω1	p	q
M7	3	-22292					-	-	-	0.51877	8.88497
M8a	4	-22292					99.99	0	1	0.51877	8.88497
M8	5	-22292	M7	-0.008956	2		99.99	0	1	0.51877	8.88497
M8	5	-22292	M8a	0	1		99.99	0	1	0.51877	8.88497
cox1
Model				LRT			Parameters
	np	ln L	Null	2Δ lnL	df		p0 (%)	p1 (%)	ω1	p	q
M7	3	-29758.9					-	-	-	0.17	15.91
M8a	4	-29747					94.98	5.02	1	0.17	13.4
M8	5	-29704.1	M7	109.689	2		99.97	0.03	347.46	0.17	11.09
M8	5	-29704.1	M8a	85.7763	1		99.97	0.03	347.46	0.17	11.09
cox2
Model				LRT			Parameters
	np	ln L	Null	2Δ lnL	df		p0 (%)	p1 (%)	ω1	p	q
M7	3	-17256.1					-	-	-	0.37	10.89
M8a	4	-17245.4					92.86	7.14	1	0.36	8.89
M8	5	-17221.3	M7	69.6151	2		99.96	0.04	368.32	0.35	7.62
M8	5	-17221.3	M8a	48.1561	1		99.96	0.04	368.32	0.35	7.62
cox3
Model				LRT			Parameters
	np	ln L	Null	2Δ lnL	df		p0 (%)	p1 (%)	ω1	p	q
M7	3	-20023.1					-	-	-	0.28	9.2
M8a	4	-20023					99.47	0.53	1	0.28	9.04
M8	5	-20010.8	M7	24.4664	2		99.98	0.02	373.93	0.27	6.99
M8	5	-20010.8	M8a	24.3678	1		99.98	0.02	373.93	0.27	6.99
cob
Model				LRT			Parameters
	np	ln L	Null	2Δ lnL	df		p0 (%)	p1 (%)	ω1	p	q
M7	3	-28984.2					-	-	-	0.32	8.65
M8a	4	-28984.2	M0				99.51	4.9	1	0.32	8.58
M8	5	-28973.9	M7	20.6547	2		99.98	0.02	279.19	0.32	7.49
M8	5	-28973.9	M8a	20.4933	1		99.98	0.02	279.19	0.32	7.49
nad1
Model				LRT			Parameters
	np	ln L	Null	2Δ lnL	df		p0 (%)	p1 (%)	ω1	p	q
M7	3	-26771.4					-	-	-	0.46	10.63
M8a	4	-26771.4					99.99	0	1	0.46	10.63
M8	5	-26771.4	M7	-0.010268	2		99.99	0	1	0.46	10.63
M8	5	-26771.4	M8a	0	1		99.99	0	1	0.46	10.63
nad2
Model				LRT			Parameters
	np	ln L	Null	2Δ lnL	df		p0 (%)	p1 (%)	ω1	p	q
M7	3	-35518.3					-	-	-	0.71	7.69
M8a	4	-35518.3					99.99	0	1	0.71	7.69
M8	5	-35518.3	M7	-0.024316	2		99.99	0	1	0.71	7.69
M8	5	-35518.3	M8a	0	1		99.99	0	1	0.71	7.69
nad4
Model				LRT			Parameters
	np	ln L	Null	2Δ lnL	df		p0 (%)	p1 (%)	ω	p	q
M7	3	-45097.7					-	-	-	0.5	8.28
M8a	4	-45097.5					99.93	0.07	1	0.51	8.57
M8	5	-45097.5	M7	0.46994	2		99.93	0.07	1	0.51	8.57
M8	5	-45097.5	M8a	0	1		99.93	0.07	1	0.51	8.57
nad5
Model				LRT			Parameters
	np	ln L	Null	2Δ lnL	df		p0 (%)	p1 (%)	ω	p	q
M7	3	-55650.7					-	-	-	0.44	7.64
M8a	4	-55650.7					99.99	0	1	0.44	7.64
M8	5	-55650.7	M7	-0.016656	2		99.99	0	1	0.44	7.64
M8	5	-55650.7	M8a	0	1		99.99	0	1	0.44	7.64
