# Supplementary material for: Positive selection on panpulmonate mitogenomes provide new clues on adaptations to terrestrial life
Source: BMC Evol Biol. 2016 Aug 22;16(1):164. doi: 10.1186/s12862-016-0735-8 (PMC4994307; doi:10.1186/s12862-016-0735-8)
Supplement: Additional file 5: — Branch-site test of positive selection on the mitochondrial genes (Model A vs. Null model). Values in bold represent highly significant differences (p < 0.01) from the null model. LRT: Likelihood ratio test, df: degrees of freedom, lnL: log likelihood, np: number of parameters. (XLSX 10 kb) [file 12862_2016_735_MOESM5_ESM.xlsx]

## Sheet: Additional File 5
Gene	Model A (np = 5)	Null (np = 4)	LRT (2Δ lnL) (df = 1)
ATP6	-23350.6	-23352.5	3.77331
COX1	-30891.2	-30899	15.5936
COX2	-18029.7	-18042.2	25.0841
COX3	-21196.1	-21196.1	0
CYTB	-30408.9	-30416.8	15.6626
ND1	-28047.3	-28047.3	2.2e-05
ND2	-36544	-36544	0.024234
ND4	-47284.4	-47287.5	6.25381
ND5	-58560.9	-58590.7	59.6259
