# Supplementary material for: Positive selection on panpulmonate mitogenomes provide new clues on adaptations to terrestrial life
Source: BMC Evol Biol. 2016 Aug 22;16(1):164. doi: 10.1186/s12862-016-0735-8 (PMC4994307; doi:10.1186/s12862-016-0735-8)
Supplement: Additional file 6: — GenBank accession numbers of the 50 sequences used in this study. (XLSX 12 kb) [file 12862_2016_735_MOESM6_ESM.xlsx]

## Sheet: Additional File 6
SPECIES	ACCESSION	LENGTH	SPECIES	ACCESSION	LENGTH
EUOPISTHOBRANCHIA			PANPULMONATA
ANASPIDEA			HYGROPHILA
Aplysiidae			Lymnaeidae
Aplysia californica	NC_005827	14117	Galba pervia	NC_018536	13768
Aplysia dactylomela	NC_015088	14128	Radix balthica	NC_026539	13983
Aplysia kurodai	NC_024260	14131	Radix auricularia	NC_026538	13745
Aplysia vaccaria	DQ991928	14130	Radix MOTU 3	KP098538	13963
CEPHALASPIDEA			Radix MOTU 5	KP098539	13832
Aglajidae			Planorbidae
Odontoglaja guamensis	DQ991935	14129	Biomphalaria glabrata	NC_005439	13670
Bullidae			Biomphalaria tenagophila	NC_010220	13722
Bulla sp.	DQ991930	13889	Planorbarius corneus	KP279639	13687
Haminoeidae			PYRAMIDELLOIDEA
Smaragdinella calyculata	DQ991938	13855	Pyramidellidae
Gastropteridae			Pyramidella dolabrata	NC_012435	13856
Sagaminopteron nigropunctatus	DQ991937	13889	SACOGLOSSA
LOWER HETEROBRANCHIA			Limapontiidae
ACTENOIDEA			Placida sp.1	NC_020343	14751
Acteonidae			Plakobranchidae
Pupa strigosa	AB028237	14189	Elysia chlorotica	NC_010567	14132
ARCHITECTIBRANCHIA			Thuridilla gracilis	DQ991939	14259
Hydatinidae			Volvatellidae
Hydatina physis	DQ991932	14153	Ascobulla fragilis	NC_012428	14745
Micromelo undata	NC_015106	14160	SIPHONARIOIDEA
NUDIPLEURA			Siphonariidae
NUDIBRANCHIA			Siphonaria gigas	NC_016188	14518
Chromodorididae			Siphonaria pectinata	NC_012383	14065
Chromodoris magnifica	DQ991931	14446	SYSTELLOMATOPHORA
Dendronotidae			Onchidiidae
Melibe leonina	NC_026987	14513	Onchidella celtica	NC_012376	14150
Tritonia diomedea	NC_026988	14540	Onchidella borealis	DQ991936	14510
Polyceridae			Platevindex mortoni	NC_013934	13991
Roboastra europaea	NC_004321	14472	Peronia peronii	NC_016181	13968
Notodoris gardineri	NC_015111	14424	STYLOMMATOPHORA
PLEUROBRANCHOMORPHA			Arionidae
Pleurobranchidae			Arion rufus	KT626607	14321
Berthellina ilisima	NC_015091	15688	Bradybaenidae
PANPULMONATA			Mastigeulota kiangsinensis	NC_024935	14029
AMPHIBOLOIDEA			Aegista diversifamilia	NC_027584	14039
Amphibolidae			Dolicheulota formosensis	NC_027493	14237
Salinator rhamphidia	NC_016185	14007	Camaenidae
ELLOBIOIDEA			Camaena cicatricosa	NC_025511	13843
Ellobiidae			Helicidae
Auriculinella bidentata	NC_016168	14135	Helicella itala	KT696546	13966
Carychium tridentatum	KT696545	13908	Pupillidae
Ovatella vulcani	NC_016175	14274	Pupilla muscorum	NC_026044	14149
Trimusculus reticulatus	NC_016193	14044	Vertiginidae
			Vertigo pusilla	NC_026045	14078
			Gastrocopta cristata	NC_026043	14060
