# Supplementary material for: Positive selection on panpulmonate mitogenomes provide new clues on adaptations to terrestrial life
Source: BMC Evol Biol. 2016 Aug 22;16(1):164. doi: 10.1186/s12862-016-0735-8 (PMC4994307; doi:10.1186/s12862-016-0735-8)
Supplement: Additional file 7: — Primer sequences used to close the gaps and complete the mitochondrial genomes of Arion and Carychium. (XLSX 9 kb) [file 12862_2016_735_MOESM7_ESM.xlsx]

## Sheet: Additional File 7
Arion rufus	Sequence (5'-3')	Gene
AV12sF	TCGCCTACGCCTCTTAATTTATTGCAC	rrnS
AV12sR	GGCATATAAGAGTGCCAGCAGCCG	rrnS
CytoBAF	GGATCTACGAGACCATTAGGGGATGT	cob
CytoBAR	GGTTGCTCAATTACACAGGCTCCA	cob
ND4R	ACCGGAACGACTACAAGCTGGA	nad4
ND4F	TGGGTCACTGATGTGTAAGCCACAA	nad4
Carychium tridentatum	Sequence (5'-3')	Gene
10255F	TTTTGGGTTATGAGCCCAACAGCTT	trnM
10729R	CCCCAAATCAAAGTTAGCAGCCTCA	trnS1
13650F	CAACTTTGATTGGGGCATTCCTTGG	nad2
14045R	GGCCTAACGCTCGGCACCAAA	trnK
03575-04159	GGTGCAGTCTTTGCTATTTTTGCTGGA	cox1
04083-00572	AGTCACTTTAATTGCCGGCTGTGT	nad5
00572-00639	TTCCAACGCTTTTAGGTGACCCAG	cob
00639-03507	TCTTGACGAACAGAGAGGTACTGGAG	cox2
