# Supplementary material for: Positive selection on panpulmonate mitogenomes provide new clues on adaptations to terrestrial life
Source: Springer Nature journal article supplement (doi:10.1186/s12862-016-0735-8), 2016-08-22

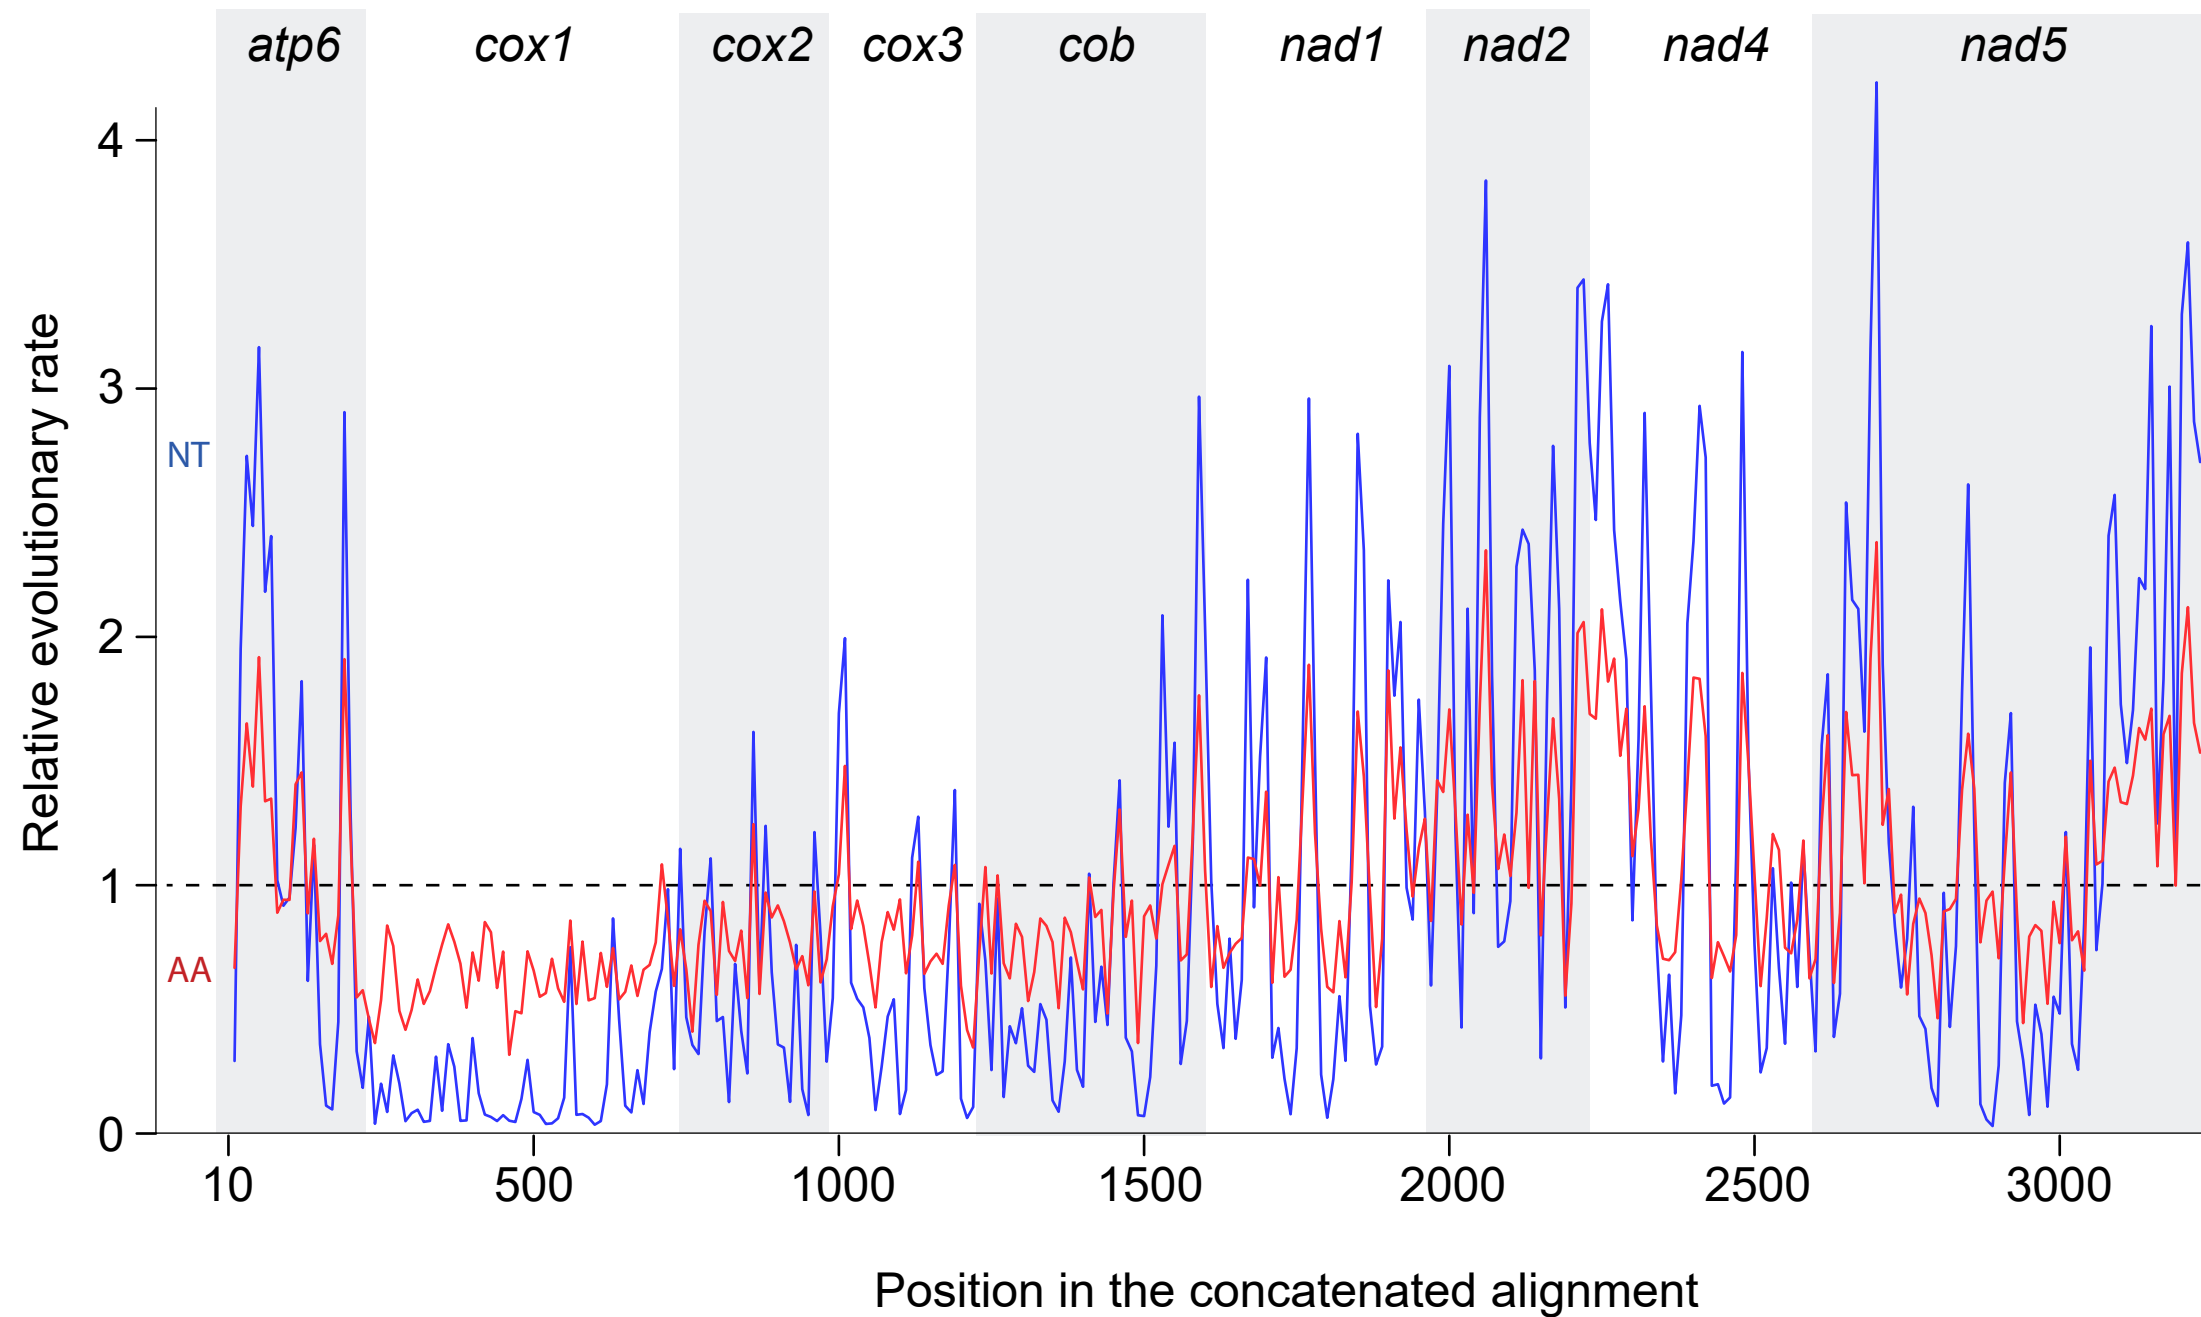

Supplement: MOESM1 [file 12862_2016_735_MOESM1_ESM.pdf]
